# Supplementary material
Source: MDPI journal article supplement (https://www.mdpi.com/1424-2818/14/10/844)
Supplement: s1 [file s1]

**Table S1.** List of *Prorocentrum*, *Takayama* and *Karenia* sequences used in phylogenetic analyses. Strain, collection information and GenBank accession number is presented. \* Indicates the sequence used in this study. ND indicates that an information was not determined.

| Species                                            | Collection Number | Collection Site                                                      | Genbank Accession Number |
|----------------------------------------------------|-------------------|----------------------------------------------------------------------|--------------------------|
| <i>Prorocentrum balticum</i>                       | CCMP1260          | Gulf of Mexico, North Atlantic Ocean                                 | EU927547                 |
|                                                    | CCMP1787          | Coastal New Zealand                                                  | EU927548                 |
| <i>Prorocentrum caipirignum</i>                    | LCA-B4            | Arraial do Cabo, Rio de Janeiro, Brazil                              | KJ960192                 |
|                                                    | PMHV-1            | Cuba                                                                 | JQ638940                 |
| <i>Prorocentrum concavum</i>                       | DS4F8             | Lingshui, Hainan, China                                              | KY010229                 |
|                                                    | DS4E11            | Lingshui, Hainan, China                                              | KY010228                 |
| <i>Prorocentrum cordatum</i>                       | CCMP1329          | Great South Bay, Long Island, New York, USA                          | EU927539                 |
|                                                    | CCMP2233          | Indian River Bay, Delaware, USA                                      | EU927541                 |
|                                                    | PmiITSC4          | Newport River, North Carolina, USA                                   | AF352371                 |
|                                                    | CCMP695           | Florida Everglades, Florida, USA                                     | EU927534                 |
|                                                    | CCMP2811          | New Pass Bridge, Sarasota, Florida, USA                              | EU927543                 |
|                                                    | CCAP1136/16       | Loch Etive, Argyll, Scotland, UK                                     | FJ823587                 |
|                                                    | PIPV-1            | Bahía de la Paz, Baja California Sur, Mexico                         | JQ616823                 |
|                                                    | KMMCC 1181        | Tongyeong, Gyeongnam (coast, surface water), South Korea             | JX402086                 |
|                                                    | PMDH01            | East China Sea, Fujian Province, China                               | DQ054538                 |
|                                                    | CCMP2780          | Cape d'Aguilar Marine Reserve, Hong Kong Island, China               | EU927542                 |
|                                                    | CAWD359           | Berowra Creek, New South Wales, Australia                            | MT895109                 |
|                                                    | IMP BG 450        | Paracas Bay, Ica, Peru                                               | OM812998*                |
| <i>Prorocentrum hoffmannianum</i>                  | CCMP2804          | Florida Keys National Marine Sanctuary, Marquesas Keys, Florida, USA | KC622311                 |
|                                                    | CCMP683           | off of Knight Key, Florida, USA                                      | KF885225                 |
| <i>P. hoffmannianum</i> (as <i>P. belizeanum</i> ) | PBHV-1            | Cuba                                                                 | JQ638934                 |
| <i>Prorocentrum lima</i>                           | CCMP2584          | New Meadows River, Maine, USA                                        | EU927517                 |
|                                                    | CCMP1743          | Mahone Bay, Nova Scotia, Canada                                      | EU927508                 |
| <i>Prorocentrum mexicanum</i>                      | VGO835            | Almerimar, Almería, Spain                                            | EU244466                 |
| <i>Prorocentrum micans</i>                         | CCMP1589          | Narragansett Bay, Rhode Island, USA                                  | EU780638                 |
|                                                    | CCAP1136/15       | Lynn of Lorne, Argyll, Scotland, UK                                  | EU927531                 |
|                                                    | CCMP690           | off of Knight Key, Florida, USA                                      | EU927521                 |
|                                                    | CCAP1136/18       | Lynn of Lorne, Argyll, Scotland, UK                                  | EU927533                 |
|                                                    | CCCM845           | ND                                                                   | EU927530                 |
| <i>Prorocentrum obtusidens</i>                     | ND                | Shengsi Islands, Zhejiang, China                                     | KF998562                 |
|                                                    | NMBjah045         | Ningbo, China                                                        | KY290718                 |
| <i>Prorocentrum steidingeriae</i>                  | CCMP687           | off of Knight Key, Florida, USA                                      | EU927554                 |
|                                                    | PXHV-1            | Cuba                                                                 | JQ638938                 |
| <i>Prorocentrum triestinum</i>                     | PT2V              | Ría de Vigo, Galicia, Spain                                          | EU244468                 |
|                                                    | VGO672            | Kervoyal, Damgan, Brittany, France                                   | EU244469                 |
|                                                    | UTEX LB 1657      | La Jolla, California, USA                                            | EU927551                 |
|                                                    | CCMP700           | Maquiot Bay, Brunswick, Maine, USA                                   | EU927549                 |
| <i>Takayama acrotrocha</i>                         | MC728-D5          | Italy                                                                | HM067011                 |
| <i>Karenia mikimotoi</i>                           | KM-FJ             | East China Sea                                                       | KT733615                 |
